# Supplementary material
Source: PubMed Central journal article supplement (PMC1857782)
Supplement: bmj_39136.528160.BE_1.pdf [file bmj_39136.528160.BE_1.pdf]

## References to Included Studies [as supplied by authors]

w1. Bergmans DC, Bonten MJ, Gaillard CA, Paling JC, van der Geest S, van Tiel FH, et al. Prevention of ventilator-associated pneumonia by oral decontamination: a prospective, randomised, double-blind, placebo-controlled study. *Am J Respir Crit Care Med* 2001;164:382-8.

w2. Kollef M, Pittet D, Sanchez Garcia M, Chastre J, Fagon JY, Bonten M, et al. A randomised double-blind trial of iseganan in prevention of ventilator-associated pneumonia. *Am J Respir Crit Care Med* 2006; 173:91-7.

w3. Laggner AN, Tryba M, Georgopoulos A, Lenz K, Grimm G, Graninger W, et al. Oropharyngeal decontamination with gentamicin for long-term ventilated patients on stress ulcer prophylaxis with sucralfate? *Wien Klin Wochenschr* 1994;106:15-9.

w4. DeRiso AJ, 2nd, Ladowski JS, Dillon TA, Justice JW, Peterson AC. Chlorhexidine gluconate 0.12% oral rinse reduces the incidence of total nosocomial respiratory infection and nonprophylactic systemic antibiotic use in patients undergoing heart surgery. *Chest* 1996;109:1556-61.

w5. Fourrier F, Cau-Pottier E, Boutigny H, Roussel-Delvallez M, Jourdain M, Chopin C. Effects of dental plaque antiseptic decontamination on bacterial colonization and nosocomial infections in critically ill patients. *Intensive Care Med* 2000;26:1239-47.

w6. Fourrier F, Dubois D, Pronnier P, Herbecq P, Leroy O, Desmettre T, et al. Effect of gingival and dental plaque antiseptic decontamination on nosocomial infections acquired in the intensive care unit: a double-blind placebo-controlled multicenter study. *Crit Care Med* 2005;33:1728-35.

w7. Koeman M, van der Ven AJ, Hak E, Joore HC, Kaasjager K, de Smet AG, et al. Oral decontamination with chlorhexidine reduces the incidence of ventilator-associated pneumonia. *Am J Respir Crit Care Med* 2006;173:1348-55.

w8. Seguin P, Tanguy M, Laviolle B, Tirel O, Malledant Y. Effect of oropharyngeal decontamination by povidone-iodine on ventilator-associated pneumonia in patients with head trauma. *Crit Care Med* 2006; 34:1514-9.

w9. Segers P, Speekenbrink RG, Ubbink DT, van Ogtrop ML, de Mol BA. Prevention of nosocomial infection in cardiac surgery by decontamination of the nasopharynx and oropharynx with chlorhexidine gluconate: A randomised controlled trial. *JAMA* 2006;296:2460-6.

w10. Rios F, Maskin B, Sanez VA, Prevention of ventilator associated pneumonia by oral decontamination: Prospective, randomised, double-blind, placebo controlled study. American Thoracic Society International Conference, San Diego, United States 2005. C95. Poster 608. [http://abstracts2view.com/ats05/view.php?nu=ATS5L\\_3301](http://abstracts2view.com/ats05/view.php?nu=ATS5L_3301)

w11. MacNaughton PD, Bailey J, Donlin N, Branfield P, Williams A, Rowswell H. A randomised controlled trial assessing the efficacy of oral chlorhexidine in ventilated patients. European Society of Intensive Care Medicine, 17th Annual Congress, Berlin, Germany. *Intensive Care Med* 2004;30(Suppl),S5-18.
